# Supplementary material for: Functional reconstruction of injured corpus cavernosa using 3D-printed hydrogel scaffolds seeded with HIF-1α-expressing stem cells
Source: PubMed Central journal article supplement (PMC7264263; doi:10.1038/s41467-020-16192-x), 2020-06-01
Supplement: 41467_2020_16192_MOESM2_ESM.pdf [file 41467_2020_16192_MOESM2_ESM.pdf]

## **Description of Additional Supplementary Files**

File name: Supplementary Movie 1

Description: 3D printing process of hydrogel scaffold

File name: Supplementary Movie 2

Description: Cell migration on heparin-coated scaffolds.

File name: Supplementary Movie 3

Description: 3D printing of the hydrogel scaffold with designed honeycomb porous structure for the repair of partial corpus cavernosa defect.
